# Supplementary material for: Adolescents and Young Adults with Acute Lymphoblastic Leukemia and Acute Myeloid Leukemia: Impact of Care at Specialized Cancer Centers on Survival Outcome
Source: Oxford University Press journal article supplement (doi:10.1158/1055-9965.epi-16-0722), 2017-02-16
Supplement: 10559965epi160722-sup-171365_1_supp_3728435_3g1493.docx [file 10559965epi160722-sup-171365_1_supp_3728435_3g1493.docx]

**Supplementary Table 2. Overall Survival: CCC/COG vs. Non-CCC/COG Facilities in AYAs**a

| Primary Diagnosis |  | **5-year Overall Survival (OS)**b | |
| --- | --- | --- | --- |
| **N (%)** | **OS (95% CI)** | **p-value** |
| Acute Lymphoblastic Leukemia (15-39y) | | | |
| CCC/COG | 122 (30%) | **59.8% (50.3-69.3%)** | **0.004** |
| Non-CCC/COG | 280 (70%) | **40.6% (34.2-47.0%)** |
| Acute Myeloid Leukemia (15-39y) | | | |
| CCC/COG | 80 (22%) | 48.1% (36.4-59.8%) | 0.9 |
| Non-CCC/COG | 279 (78%) | 49.1% (42.8-55.4%) |

aCCC: NCI-designated Comprehensive Cancer Center; COG: Children’s Oncology Group

bKaplan-Meier survival analysis
