# Supplementary material for: Adolescents and Young Adults with Acute Lymphoblastic Leukemia and Acute Myeloid Leukemia: Impact of Care at Specialized Cancer Centers on Survival Outcome
Source: Oxford University Press journal article supplement (doi:10.1158/1055-9965.epi-16-0722), 2017-02-16
Supplement: 10559965epi160722-sup-171365_1_supp_3728436_mg1493.docx [file 10559965epi160722-sup-171365_1_supp_3728436_mg1493.docx]

**Supplementary Table 3. Hazard of Death**a,b

|  | **Acute Lymphoblastic Leukemia** | | **Acute Myeloid Leukemia** | |
| --- | --- | --- | --- | --- |
|  | HR d (95% CI) | p-value | HR (95% CI) | p-value |
| **Gender** |  |  |  |  |
| Male | 1.0 (0.8-1.3) | 0.8 | 1.2 (0.9-1.6) | 0.2 |
| **Race/Ethnicity** | | | | |
| **Non-Hispanic White** | 1.0 | - | 1.0 | - |
| **African-American/Hispanic** | 1.5 (1.0-2.3) | 0.06 | 1.2 (0.8-1.7) | 0.4 |
| **Asian-Pacific Islander** | 0.7 (0.3-1.5) | 0.7 | 1.0 (0.6-1.7) | 1.0 |
| **Socioeconomic Status (SES)** | | | | |
| **High SES** | 1.0 | - | 1.0 | - |
| **Middle SES** | 0.8 (0.5-1.3) | 0.3 | 1.4 (0.9-2.4) | 0.2 |
| **Low SES** | 1.0 (0.6-1.7) | 0.9 | 1.3 (0.7-2.3) | 0.4 |
| **Payor** | | | | |
| **Private Insurance** | 1.0 | - | 1.0 | - |
| **Public/No Insurance** | 1.0 (0.8-1.4) | 0.7 | 1.1 (0.8-1.5) | 0.5 |

aThis table presents additional findings from multivariable Cox regression analysis as presented in Table 3, including 1-39y patients with AML and 10-39y ALL patients. The results above are also adjusted for age and CCC/COG vs. Non-CCC/COG

bNS = not statistically significant
